# Supplementary material
Source: PubMed Central journal article supplement (PMC2817618)
Supplement: en.2009-0955_1.pdf [file en.2009-0955_1.pdf]

582 **Supplemental Figure 1.** Western blots with ER $\alpha$  antibody demonstrated that ER $\alpha$  protein expression  
583 was high at PND 4 in both female and male mouse cortex. ER $\alpha$  protein expression was lower at PND 10  
584 and virtually absent by PND 18 in both male and female mouse cortex.

585

586 **Supplemental Figure 2.** To determine if gender influenced the association of MeCP2 with ER $\alpha$   
587 promoters, we conducted a ChIP assay. Cortical tissue was taken from female and male mouse pups at  
588 PND 4, 10 and 18. Nuclear proteins were then cross-linked and sheared chromatin was  
589 immunoprecipitated (IP) with MeCP2 antibody. Recovered chromatin was amplified by standard PCR  
590 using primers spanning regions of Exon A. Non-immune IgG was used in all ChIP reactions as a control.  
591 An ethidium bromide-stained gel of PCR products showed a representative of ChIP analysis. In= Input,  
592 Ip= immunoprecipitated with MeCP2 antibody, NI=non-immune IgG antibody.

593

# Supplemental Figure 1

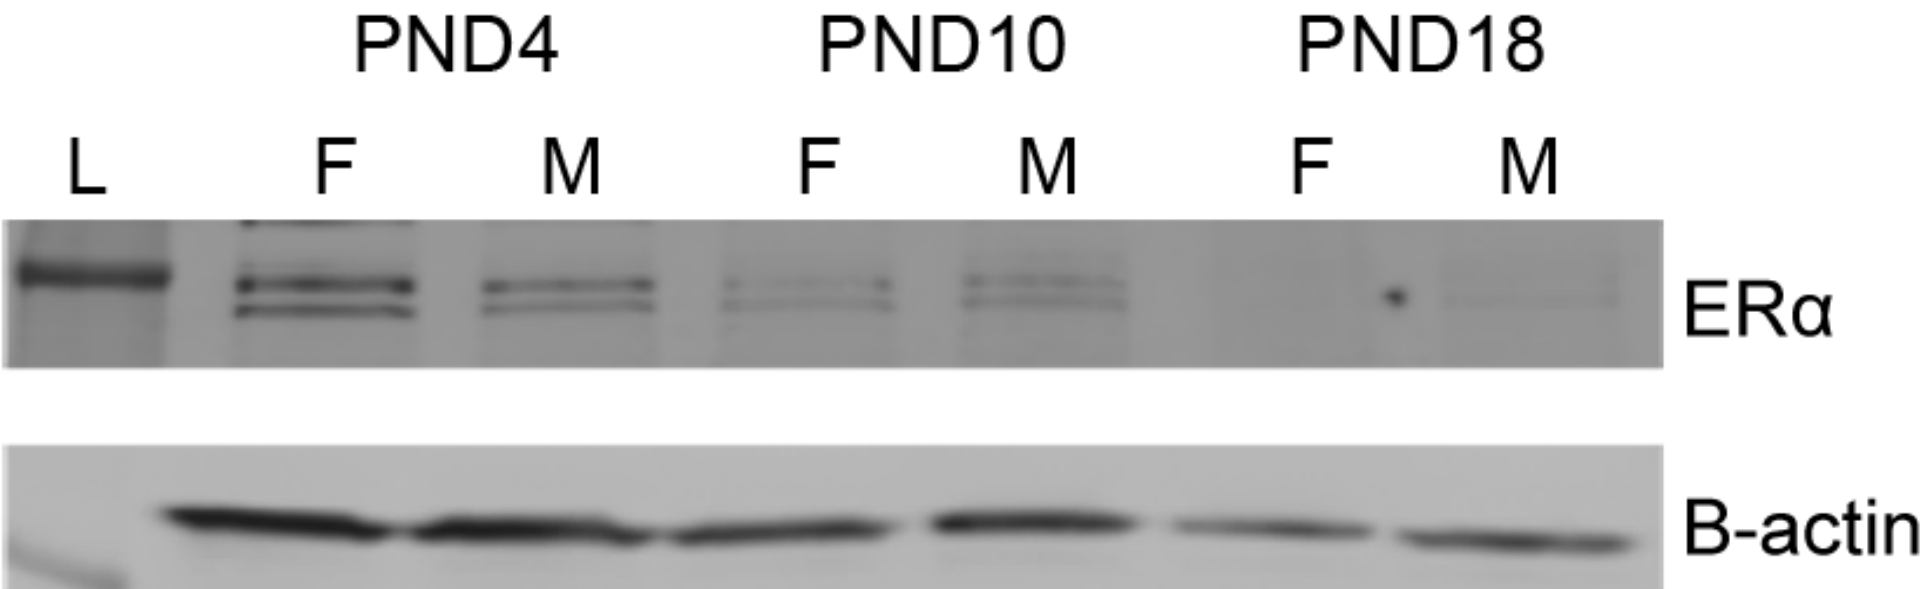

# Supplemental Figure 2

Exon A

PND4

PND10

PND18

L

In

Ip

NI

In

Ip

NI

In

Ip

NI

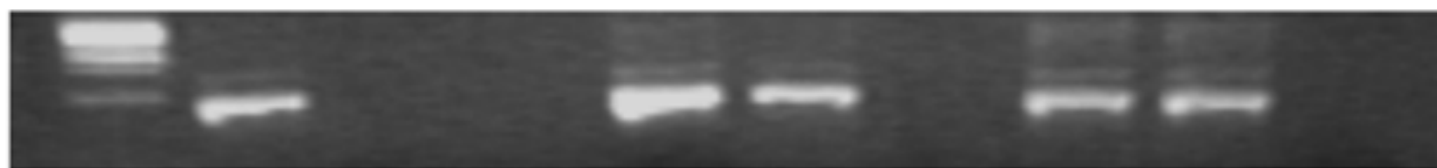

Female

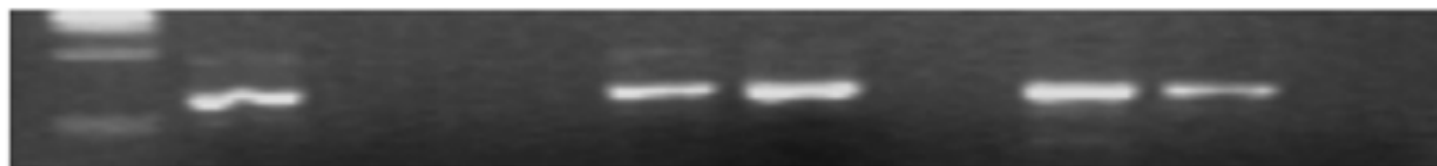

Male
